# Supplementary material for: Synthesis of Small Ce3+-Er3+-Yb3+ Tri-Doped BaLuF5 Active-Core-Active-Shell-Active-Shell Nanoparticles with Strong Down Conversion Luminescence at 1.5 μm
Source: MDPI journal article supplement (doi:10.3390/nano8080615), 2018-08-14
Supplement: s1 [file s1]

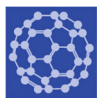

# Supplementary Materials: Synthesis of Small $\text{Ce}^{3+}$ - $\text{Er}^{3+}$ - $\text{Yb}^{3+}$ Tri-Doped $\text{BaLuF}_5$ Active-core-active-shell-active-shell Nanoparticles with Strong Down Conversion Luminescence at $1.5\ \mu\text{m}$

Yongling Zhang, Yudi Shi, Zhengkun Qin, Mingxing Song and Weiping Qin

We measured the photo stability of  $\text{BaLuF}_5:18\%\text{Yb}^{3+},2\%\text{Er}^{3+},2\%\text{Ce}^{3+}@\text{BaLuF}_5:5\%\text{Yb}^{3+}@\text{BaLuF}_5:5\%\text{Yb}^{3+}$  core-active-shell-active-shell NPs. Figure S1a shows the intensity change of  $\text{BaLuF}_5:18\%\text{Yb}^{3+},2\%\text{Er}^{3+},2\%\text{Ce}^{3+}@\text{BaLuF}_5:5\%\text{Yb}^{3+}@\text{BaLuF}_5:5\%\text{Yb}^{3+}$  core-active-shell-active-shell NPs for 980 nm constant light exposure. The inset shows the down conversion (DC) emission of the core-active-shell-active-shell NPs after 980 nm laser light irradiation for 0 h, 6 h, and 12 h, respectively (Figure S1b). The intensity of the core-active-shell-active-shell NPs has no change. That results the show  $\text{BaLuF}_5:18\%\text{Yb}^{3+},2\%\text{Er}^{3+},2\%\text{Ce}^{3+}@\text{BaLuF}_5:5\%\text{Yb}^{3+}@\text{BaLuF}_5:5\%\text{Yb}^{3+}$  core-active-shell-active-shell NPs have optical stability.

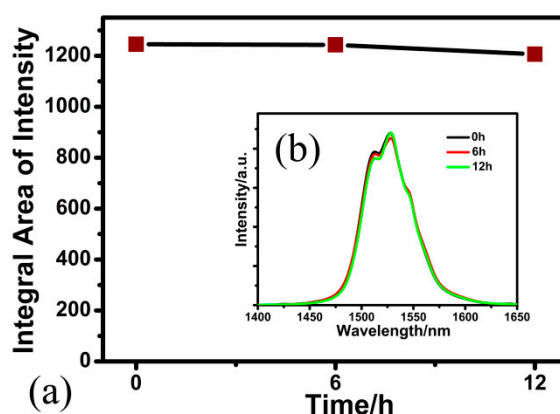

**Figure S1.** (a) The intensity change of  $\text{BaLuF}_5:18\%\text{Yb}^{3+},2\%\text{Er}^{3+},2\%\text{Ce}^{3+}@\text{BaLuF}_5:5\%\text{Yb}^{3+}@\text{BaLuF}_5:5\%\text{Yb}^{3+}$  core-active-shell-active-shell NPs for 980 nm constant light exposure. (b) The inset shows the down conversion (DC) emission of the core-active-shell-active-shell NPs after 980 nm laser light irradiation for 0 h, 6 h, and 12 h, respectively.
